# Supplementary material for: Expressing anti-HIV VRC01 antibody using the murine IgG1 secretion signal in Pichia pastoris
Source: PubMed Central journal article supplement (PMC5366992; doi:10.1186/s13568-017-0372-7), 2017-03-24

# Heavy Chain

# Light Chain

KB

L

$\alpha$ 1

$\alpha$ 2

M1

M2

L

$\alpha$ 1

$\alpha$ 2

M1

M2

2000  
1500  
1000  
800  
600  
400

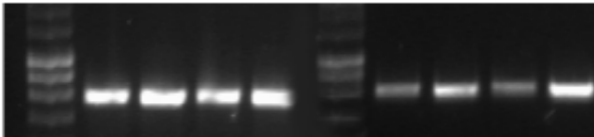

Supplement: 13568_2017_372_MOESM1_ESM.pdf [file 13568_2017_372_MOESM1_ESM.pdf]
