# Supplementary material for: Expressing anti-HIV VRC01 antibody using the murine IgG1 secretion signal in Pichia pastoris
Source: PubMed Central journal article supplement (PMC5366992; doi:10.1186/s13568-017-0372-7), 2017-03-24

**A**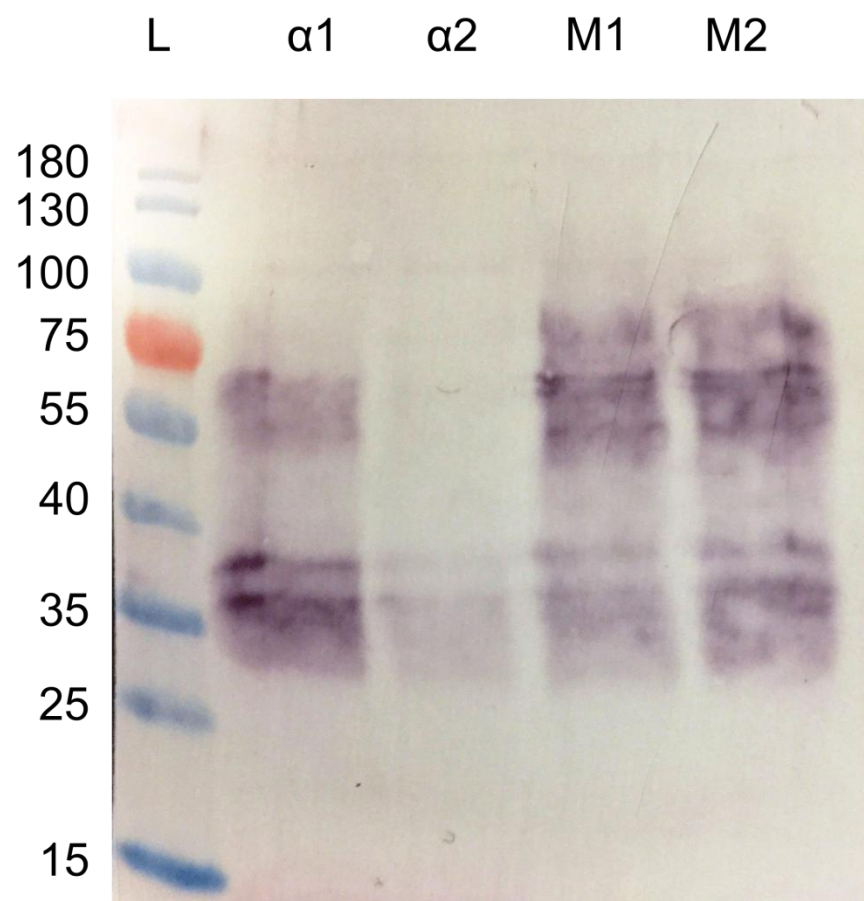**B**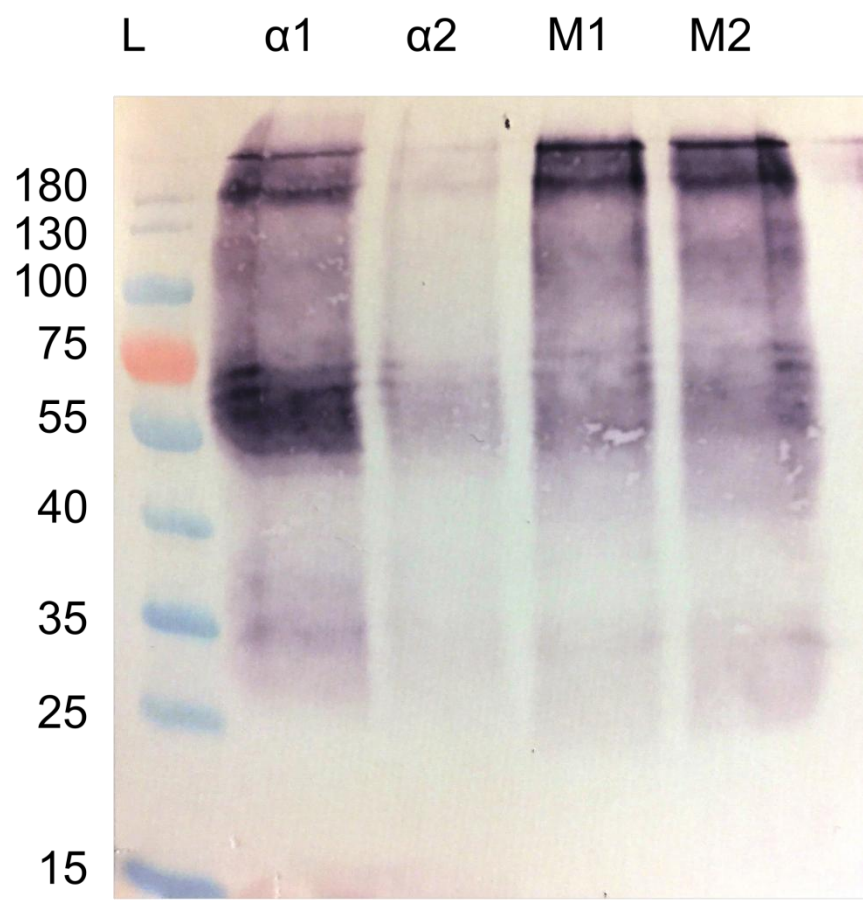

Supplement: 13568_2017_372_MOESM3_ESM.pdf [file 13568_2017_372_MOESM3_ESM.pdf]
